# Supplementary material for: Concise two-step chemical synthesis of molnupiravir
Source: Royal Society of Chemistry journal article supplement (doi:10.1039/d2ra05064a), 2022-01-01

## Electronic Supplementary Information

### Concise Two-Step Chemical Synthesis of Molnupiravir

Vinícius R. D. Pereira,<sup>a</sup> Marco A. M. Bezerra,<sup>b</sup> Mauro R. B. P. Gomez,<sup>b</sup> Guilherme M. Martins,<sup>c</sup> Adilson D. da Silva,<sup>a</sup> Kleber T. de Oliveira,<sup>c</sup> Rodrigo O. M. A. de Souza <sup>b\*</sup> and Giovanni W. Amarante <sup>a\*</sup>

#### Contents:

#### 1. Images

|                                                                                   |   |
|-----------------------------------------------------------------------------------|---|
| 1.1 Images from one-pot cetalization/esterification step to compound (4) .....    | 2 |
| 1.2 Images from one-pot oxyamination/deprotection step to molnupiravir (2). ..... | 3 |
| 1.3 Images from 10g scale-up .....                                                | 4 |

#### 2. NMR spectra

|                                                            |    |
|------------------------------------------------------------|----|
| 2.1 <sup>1</sup> H-NMR spectrum of compound (3) .....      | 5  |
| 2.2 <sup>13</sup> C-NMR spectrum of compound (3) .....     | 6  |
| 2.3 <sup>1</sup> H-NMR spectrum of compound (4) .....      | 7  |
| 2.4 <sup>13</sup> C-NMR spectrum of compound (4) .....     | 8  |
| 2.5 <sup>1</sup> H-NMR spectrum of molnupiravir (2) .....  | 9  |
| 2.6 <sup>13</sup> C-NMR spectrum of molnupiravir (2) ..... | 10 |

#### 3. Tables 1, 2 and 3

|                                                                         |    |
|-------------------------------------------------------------------------|----|
| 3.1 Table 1: Comparison of synthetic routes starting from uridine ..... | 11 |
| 3.2 Oxyamination step comparison to refs 10 and 11 .....                | 12 |
| 3.3 Comparison of synthetic routes to refs 10 and 11 .....              | 13 |

#### 4. Total ion chromatogram (TIC) and high-resolution mass spectrum of monulpiravir sample in positive and negative ionization modes

|                      |    |
|----------------------|----|
| 4.1 C18 column ..... | 14 |
|----------------------|----|

# 1. Images

## 1.1 Images from one-pot cetalization/esterification step to compound (4)

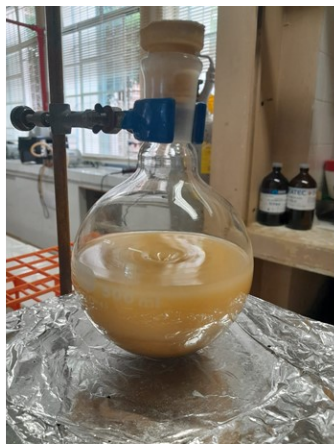

Cetalization reaction  
after 1 h

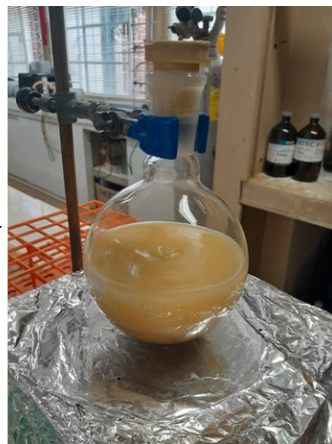

Esterification reaction  
after 1 h

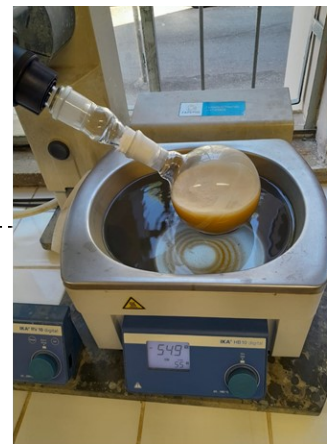

Solvent removal under  
reduced pressure

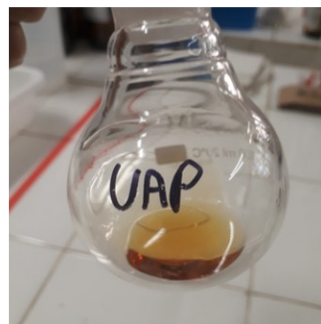

Compound (4)

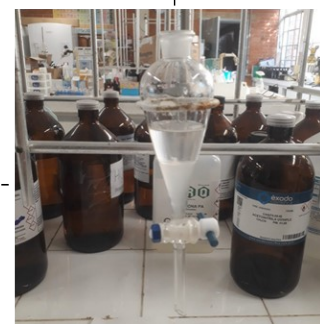

Liquid/liquid extraction  
followed by solvent removal  
under reduced pressure

1.2 Images from one-pot oxyamination/deprotection step to molnupiravir (2).

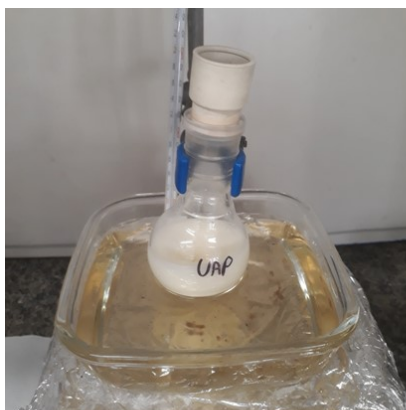

Oxyamination reaction  
after 2 h

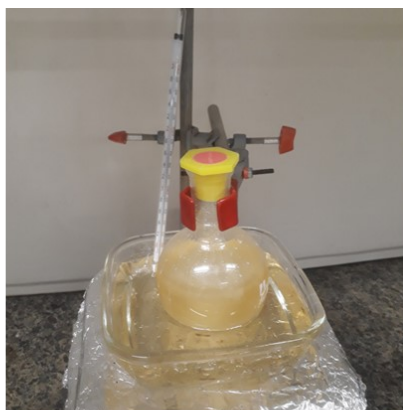

Deprotection reaction  
after 30 min

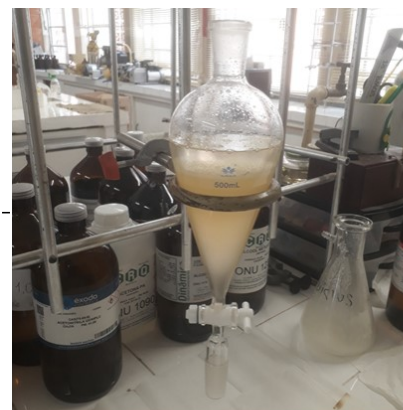

Neutralization with  $\text{Na}_2\text{CO}_3$  (pH around 7-8)  
followed by the extraction with AcOEt

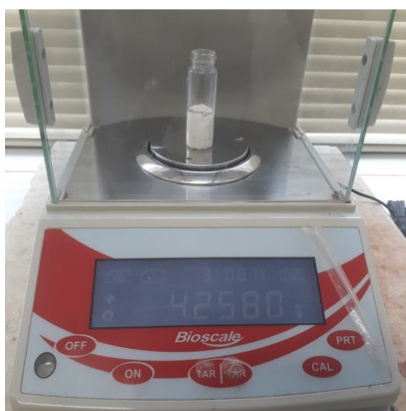

molnupiravir (2)

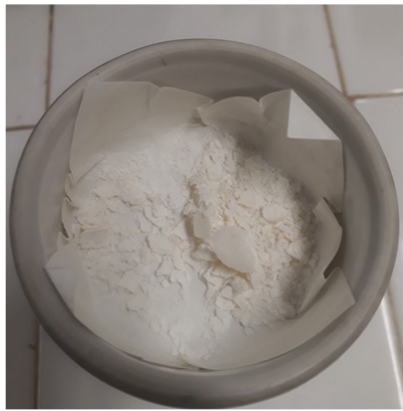

After recrystallization  
(AcOEt 1:1 MeCN)

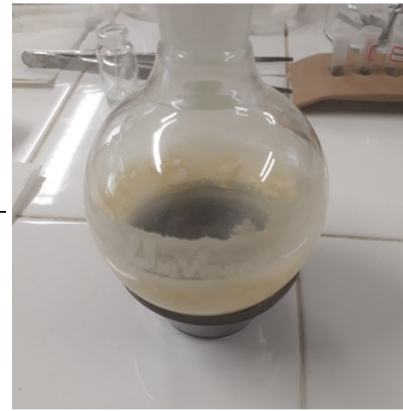

After solvent removal  
under reduced pressure

### 1.3 Images from 10g scale-up

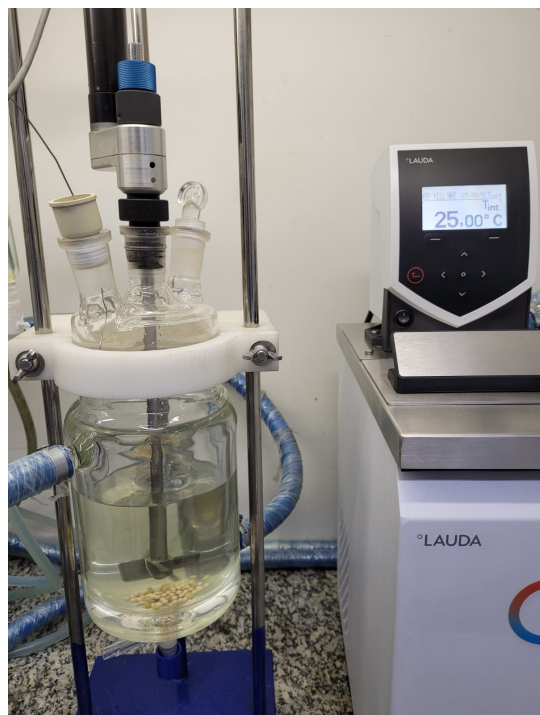

10g scale apparatus

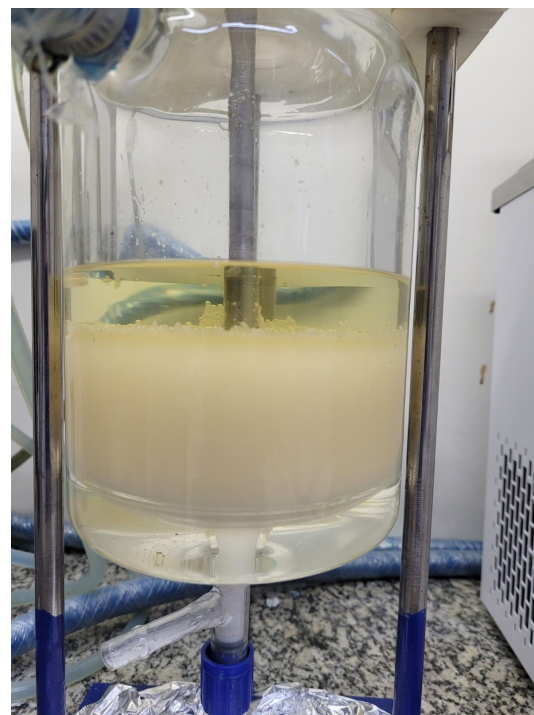

Work-up

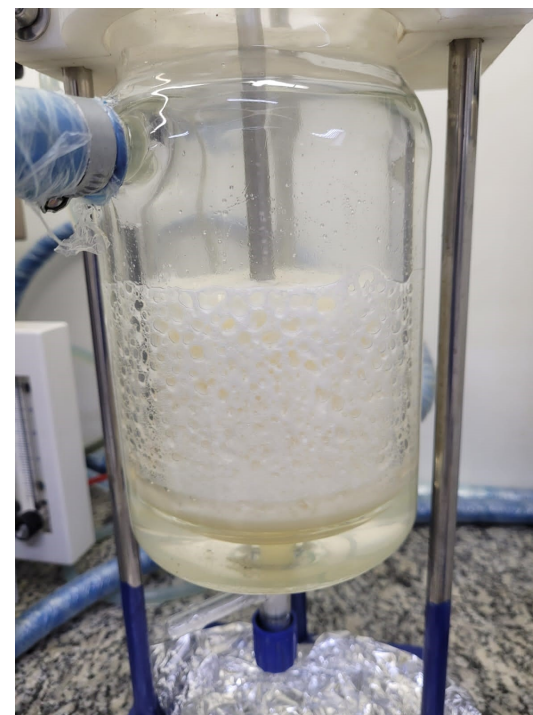

Isolation

## 2. NMR spectra

### 2.1 $^1\text{H-NMR}$ (500 MHz, $\text{CDCl}_3$ ) spectrum of compound (3).

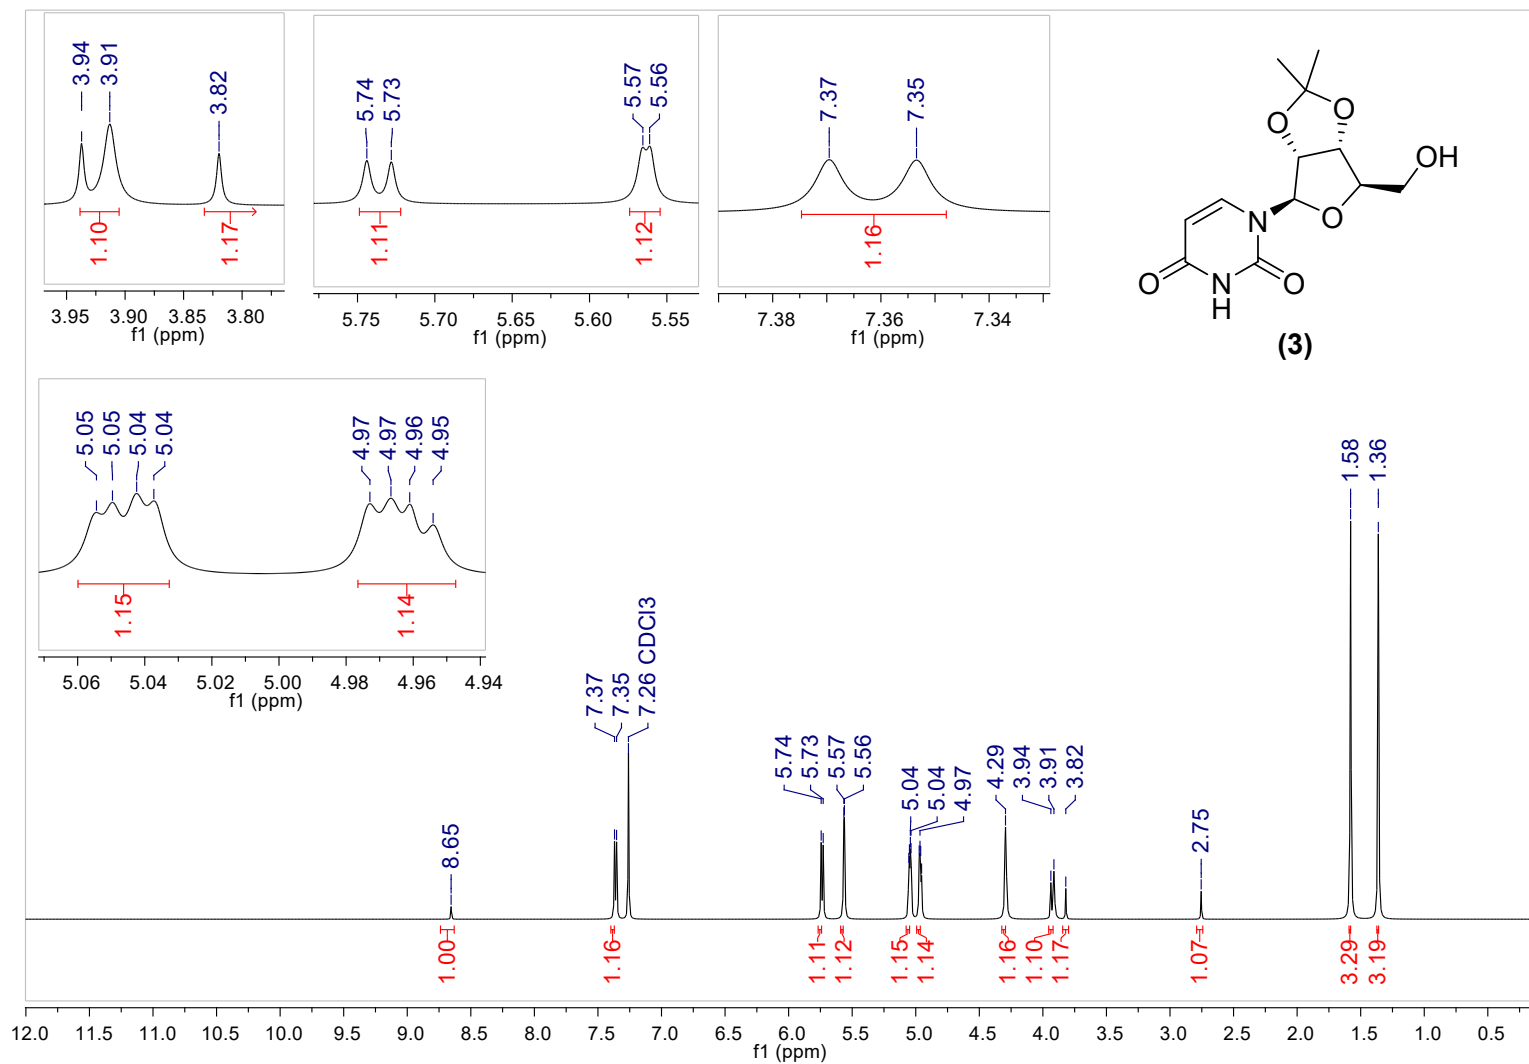

2.2  $^{13}\text{C}$ -NMR (125 MHz,  $\text{CDCl}_3$ ) spectrum of compound (3).

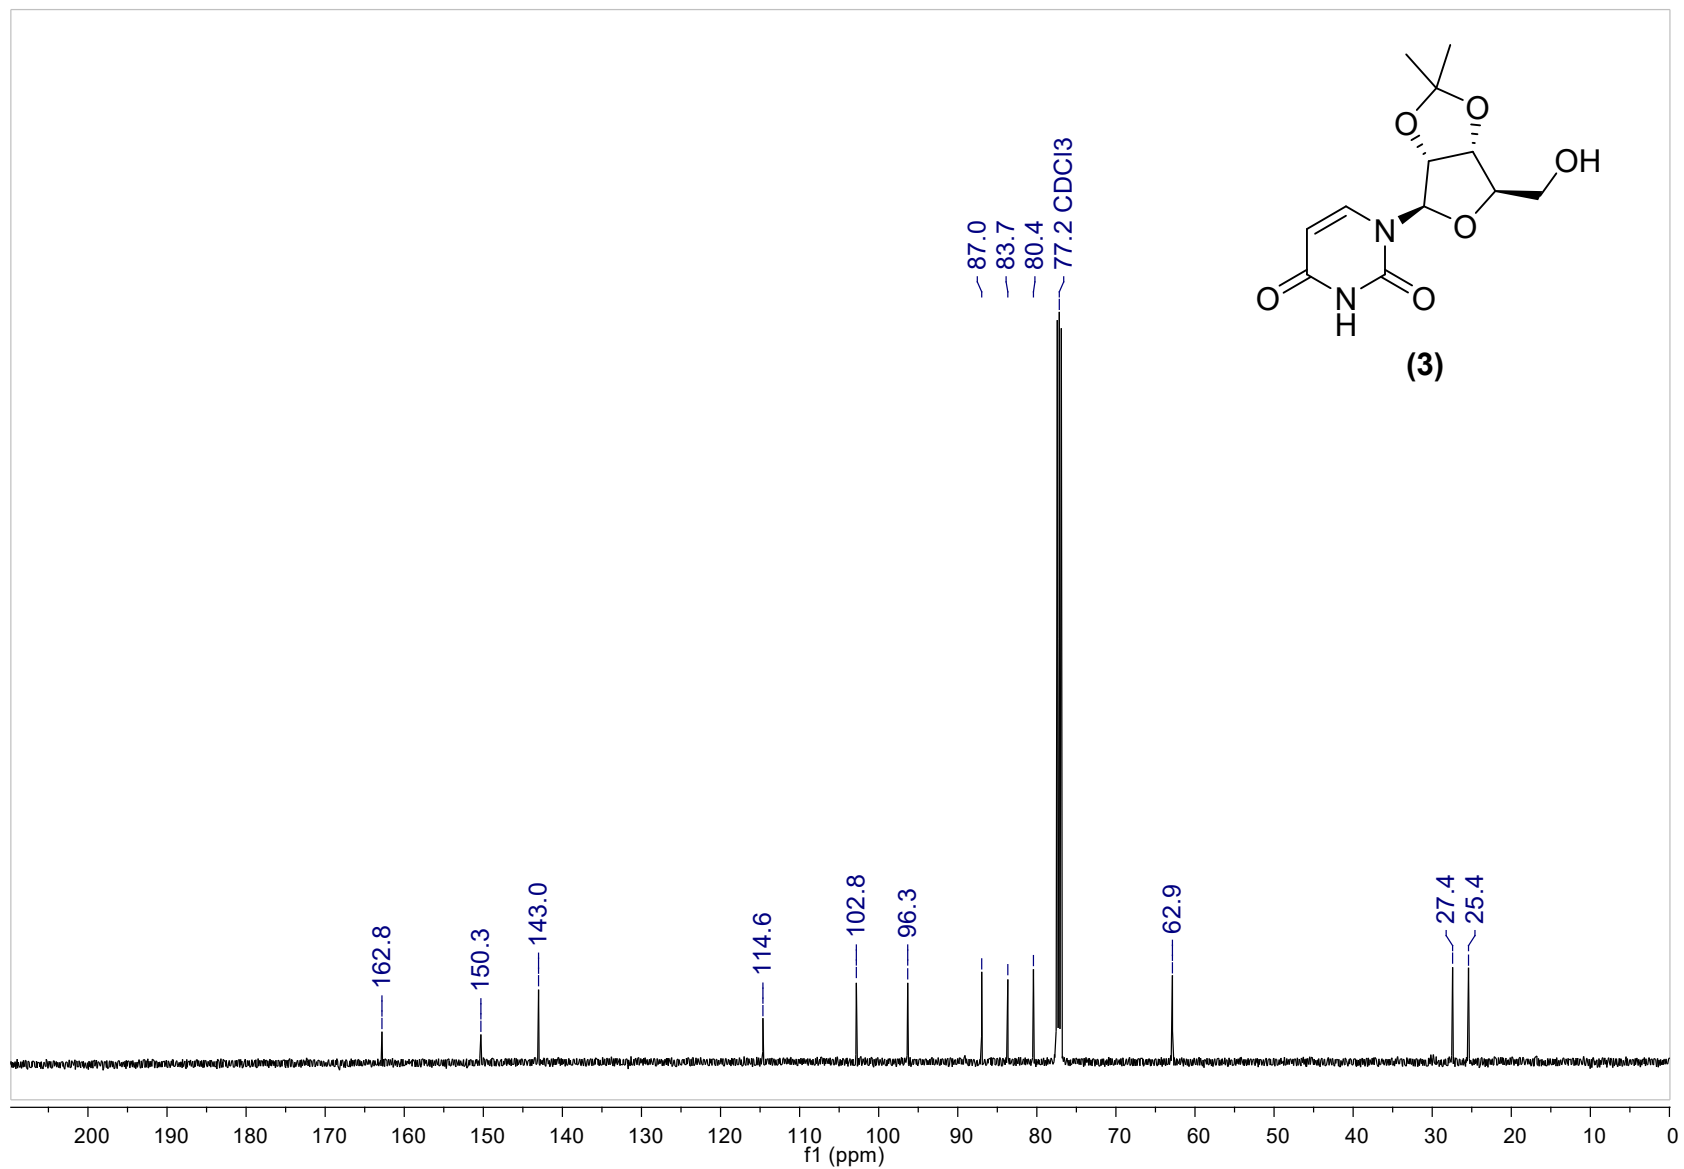

2.3 <sup>1</sup>H-NMR (500 MHz, CDCl<sub>3</sub>) spectrum of compound (4).

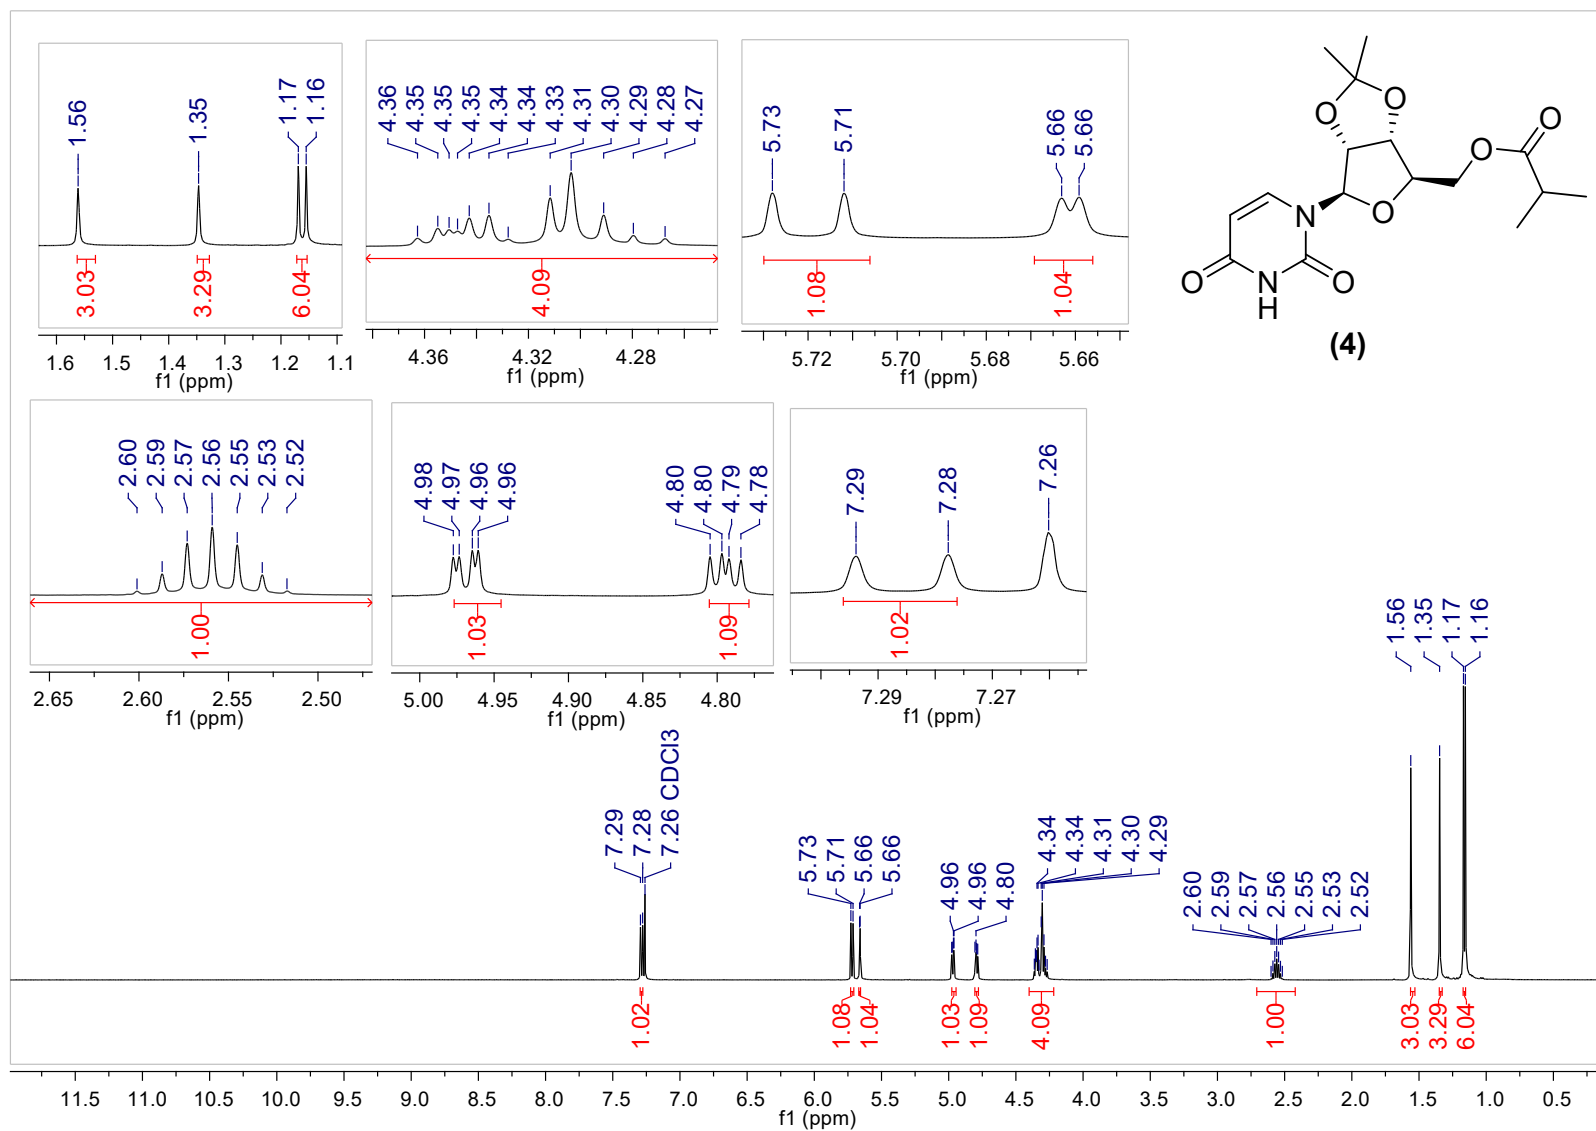

2.4  $^{13}\text{C}$ -NMR (125 MHz,  $\text{CDCl}_3$ ) spectrum of compound (4).

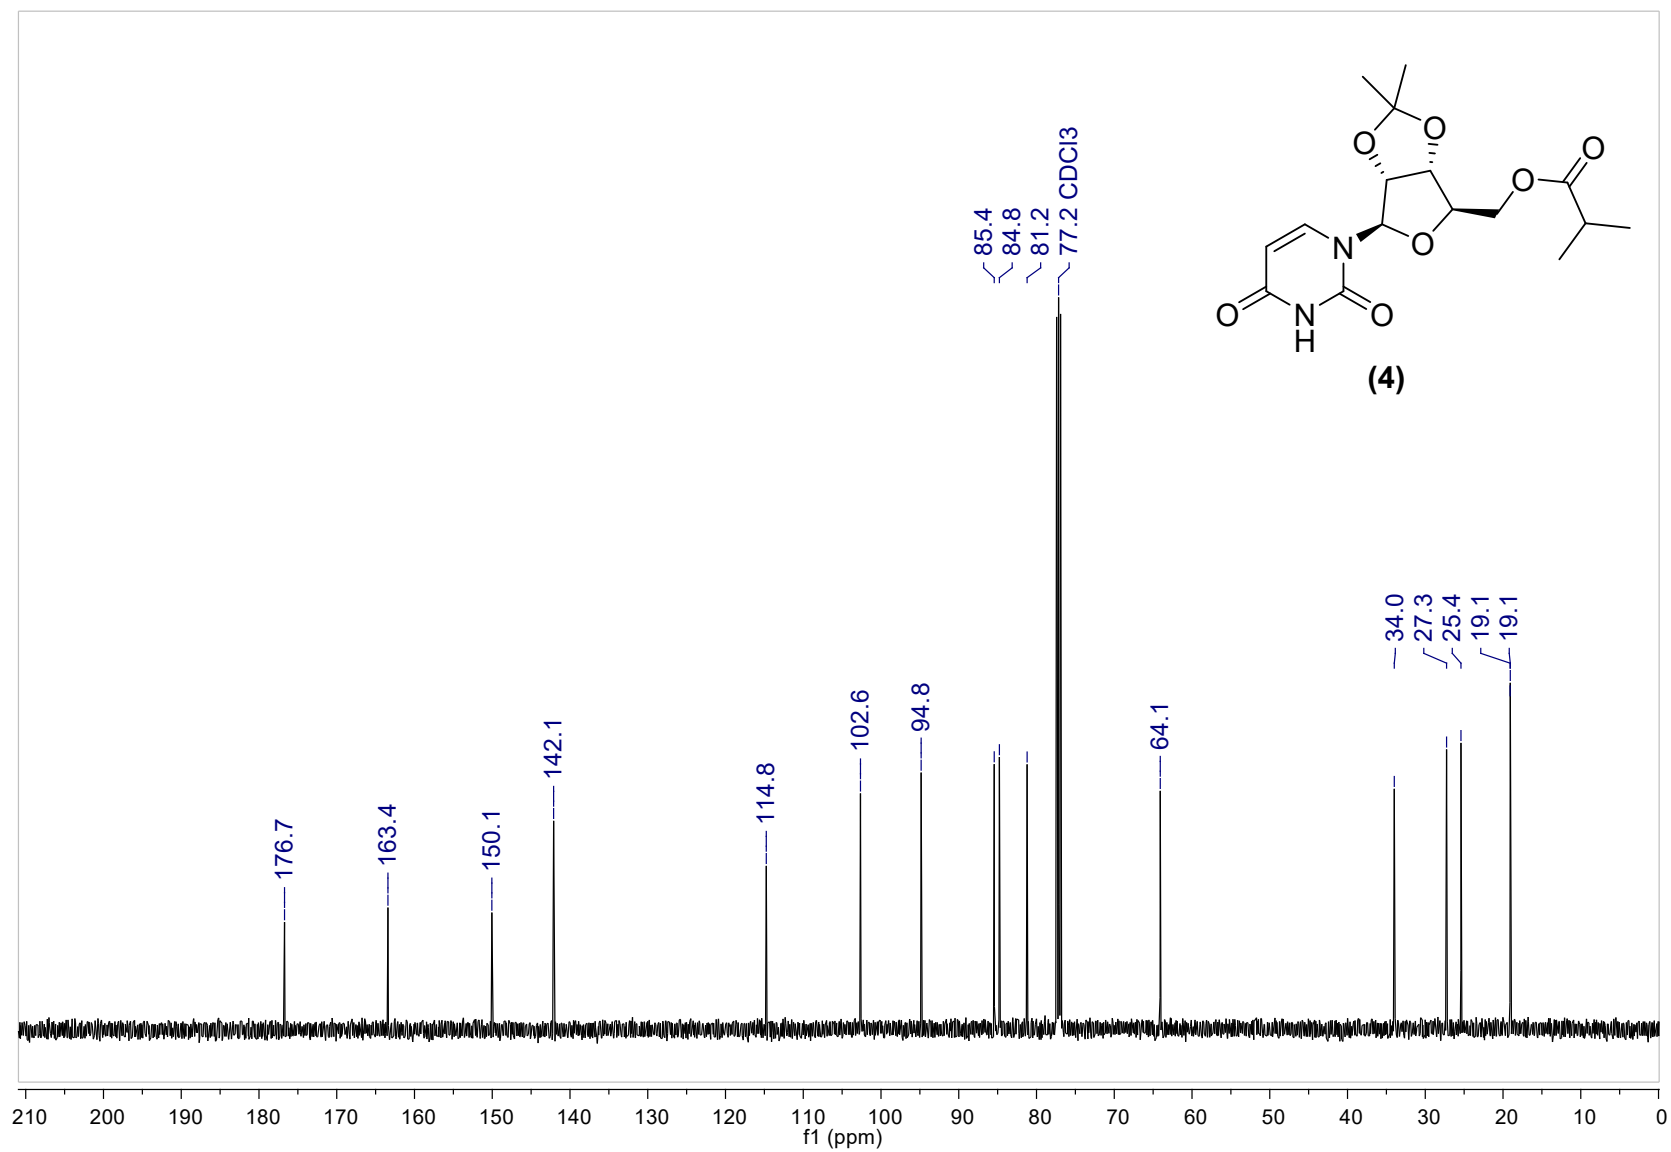



2.5 <sup>1</sup>H-NMR (500 MHz, CD<sub>3</sub>OD) spectrum of molnupiravir (**2**).

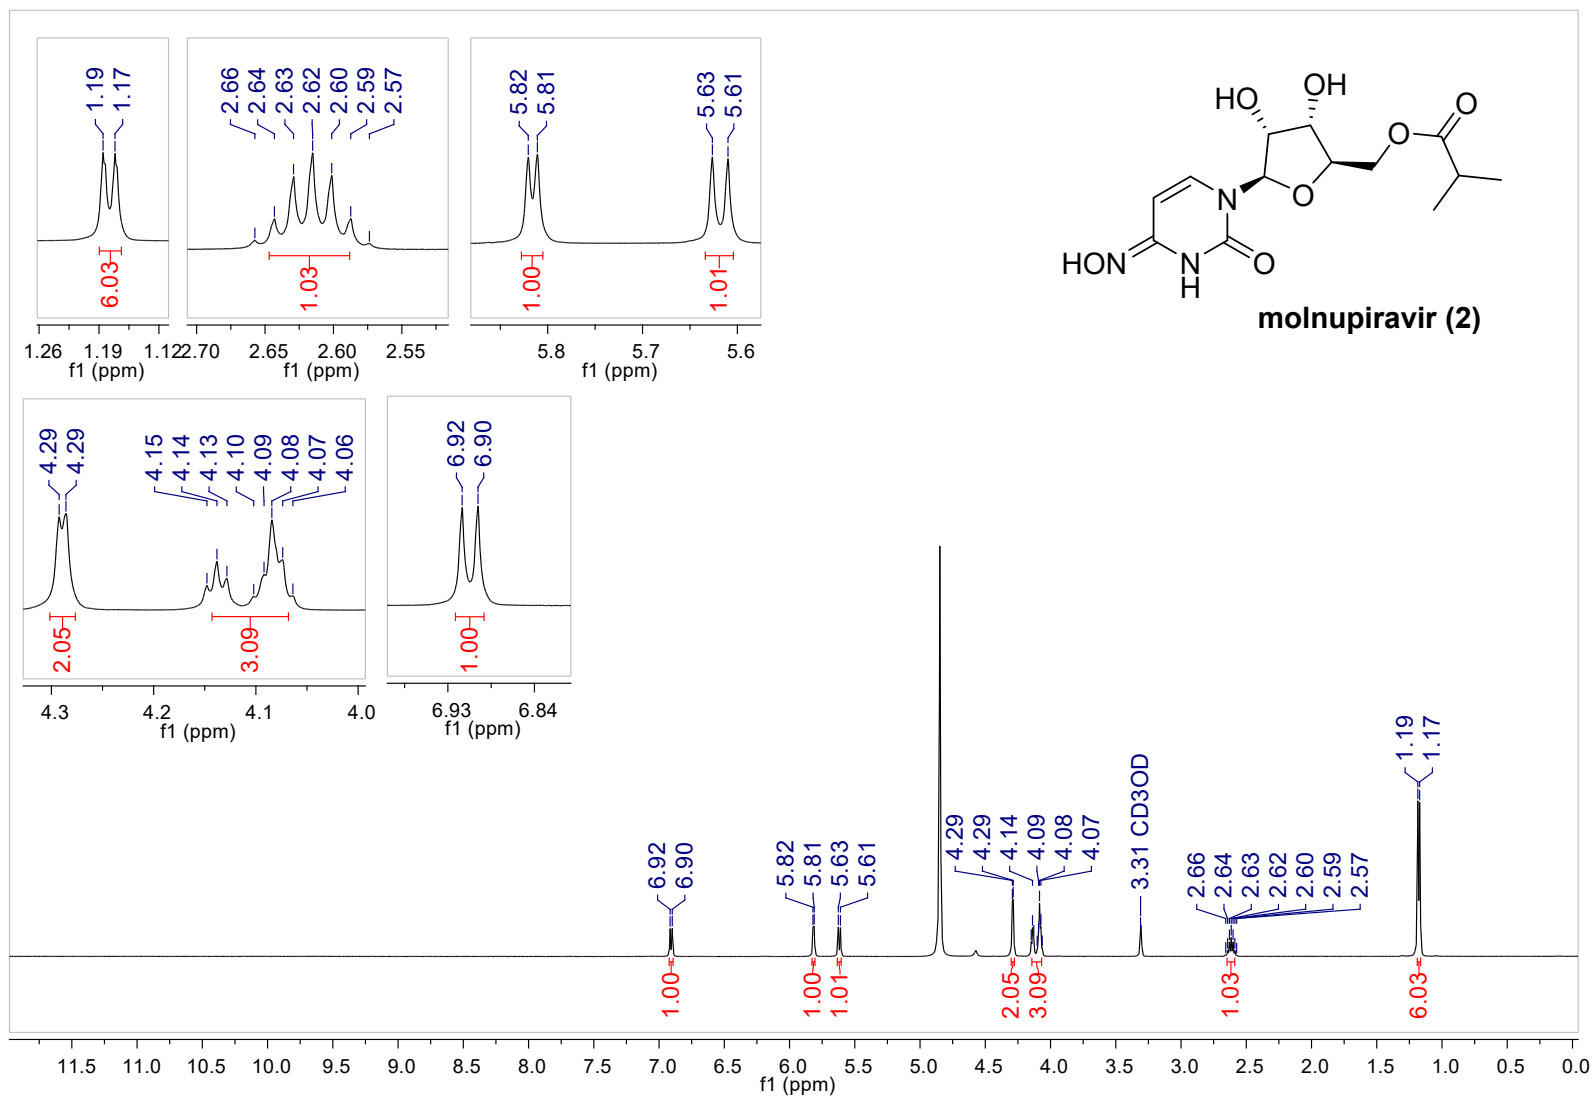

2.6  $^{13}\text{C}$ -NMR (125 MHz,  $\text{CD}_3\text{OD}$ ) spectrum of molnupiravir (**2**).

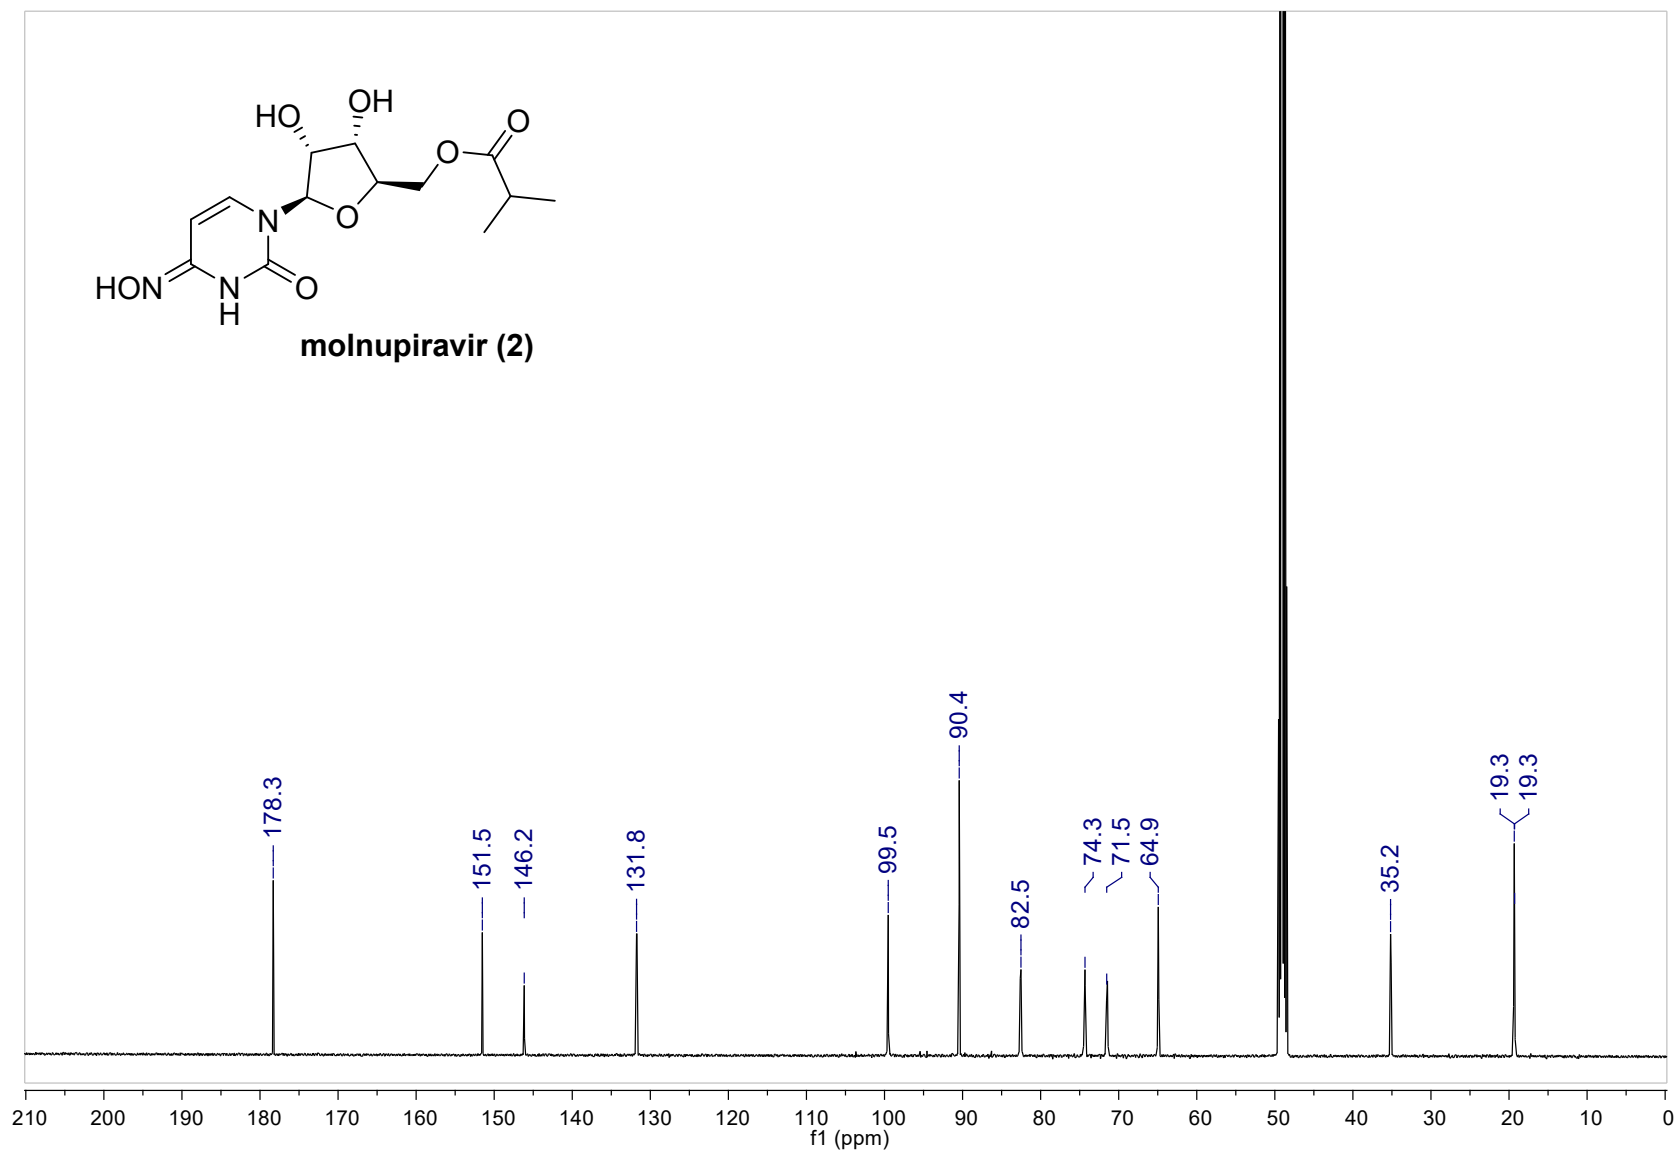

### 3. Tables 1, 2 and 3

3.1 Table 1: Comparison of synthetic routes starting from uridine

| <b>Parameter</b>       | <b>Painter <i>et al.</i>, 2019</b><br>WO pat. WO2019113462, 2019. | <b>Fier <i>et al.</i>, 2021</b><br>Org. Process Res. Dev. 2021, 25,<br>2806–2815 | <b>Dey <i>et al.</i>, 2021</b><br>ACS Omega 2021, 6,<br>28366–28372 | <b>Our work</b>                                      |
|------------------------|-------------------------------------------------------------------|----------------------------------------------------------------------------------|---------------------------------------------------------------------|------------------------------------------------------|
| Overall yield          | <17%                                                              | 57%                                                                              | 62%                                                                 | 68%                                                  |
| Steps                  | 5                                                                 | 5                                                                                | 2                                                                   | 2                                                    |
| Total time             | >40 h                                                             | >35 h                                                                            | >12 h                                                               | 4,5 h                                                |
| Purification protocols | Includes column chromatography                                    | Solvent washes and liquid-liquid extractions                                     | Includes column chromatography                                      | Only liquid-liquid extractions and recrystallization |
| Activation step        | Insertion of 1,2,4-triazole                                       | Insertion of 1,2,4-triazole                                                      | Formation of a thionated intermediate                               | No need of any extra activation step                 |

### 3.2 Oxyamination step comparison to refs 10 and 11

| <b>Parameter</b>       | <b>Benkovics <i>et al.</i>, 2020</b> (T. Benkovics, J. McIntosh, S. Silverman, J. Kong, P. Maligres, T. Itoh, H. Yang, M. Huffman, D. Verma and W. Pan, <i>ChemRxiv</i> , 2020.)<br><br><b>McIntosh <i>et al.</i> 2021</b> ( <i>ACS Central Science</i> , 2021, 7, 1980-1985.) | <b>Our work</b>                              |
|------------------------|--------------------------------------------------------------------------------------------------------------------------------------------------------------------------------------------------------------------------------------------------------------------------------|----------------------------------------------|
| Oxyamination yield     | 86%                                                                                                                                                                                                                                                                            | 84%                                          |
| Total time             | 6 h                                                                                                                                                                                                                                                                            | 2 h                                          |
| Purification protocols | Several solvent washes, extractions and pH adjusts                                                                                                                                                                                                                             | Only one and simple liquid-liquid extraction |

### 3.3 Comparison of synthetic routes to refs 10 and 11

| <b>Parameter</b>       | <b>Benkovics <i>et al.</i>, 2020</b> (T. Benkovics, J. McIntosh, S. Silverman, J. Kong, P. Maligres, T. Itoh, H. Yang, M. Huffman, D. Verma and W. Pan, <i>ChemRxiv</i> , 2020.)<br><br><b>McIntosh <i>et al.</i> 2021</b> ( <i>ACS Central Science</i> , 2021, 7, 1980-1985.) | <b>Our work</b>                                      |
|------------------------|--------------------------------------------------------------------------------------------------------------------------------------------------------------------------------------------------------------------------------------------------------------------------------|------------------------------------------------------|
| Overall yield          | 69%                                                                                                                                                                                                                                                                            | 68%                                                  |
| Steps                  | 3                                                                                                                                                                                                                                                                              | 2                                                    |
| Total time             | 36 h                                                                                                                                                                                                                                                                           | 4,5 h                                                |
| Purification protocols | Solvent washes, extractions and pH adjusts                                                                                                                                                                                                                                     | Only liquid-liquid extractions and recrystallization |

## 4. Total ion chromatogram (TIC) and high-resolution mass spectrum of monupiravir sample in positive and negative ionization modes

### 4.1 C18 column

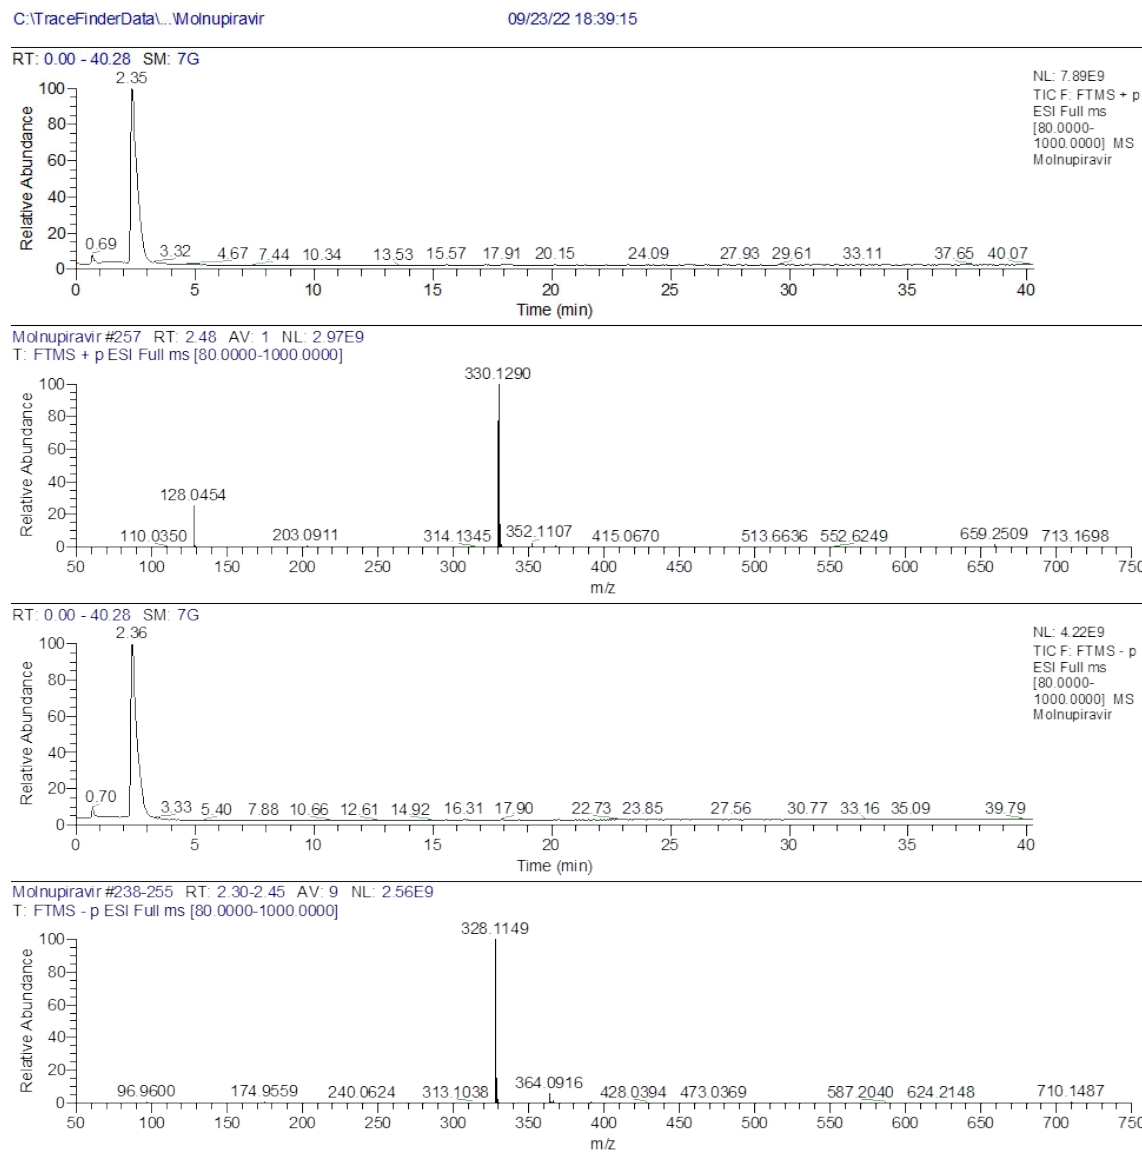

Supplement: d2ra05064a1.pdf [file d2ra05064a1.pdf]
